# Supplementary material for: Consummatory, Feeding Microstructural, and Metabolic Effects Induced by Limiting Access to Either a High-Sucrose or a High-Fat Diet
Source: PubMed Central journal article supplement (PMC7352440; doi:10.3390/nu12061610), 2020-05-30
Supplement: nutrients-12-01610-s001.pdf [file nutrients-12-01610-s001.pdf]

Article

# Consummatory, feeding microstructural and metabolic effects induced by limiting access to either a high-sucrose or a high-fat diet

Harrison Lee <sup>1</sup>, Elisa Giunti <sup>1</sup>, Valentina Sabino <sup>1</sup> and Pietro Cottone <sup>1,\*</sup>

Laboratory of Addictive Disorders, Departments of Pharmacology and Psychiatry, Boston University School of Medicine, Boston, MA, USA

\* Correspondence: cottone@bu.edu; 001-617-358-1950

**Supplementary Table S1.** Diets

|                                    | Diet     |          |          |
|------------------------------------|----------|----------|----------|
|                                    | Chow     | HSD      | HFD      |
| Manufacturer                       | TestDiet | TestDiet | Bio-Serv |
| Diet ID                            | 5TUM     | 5TUL     | F07679   |
| Macronutrient Composition (kcal %) |          |          |          |
| Protein                            | 24.1     | 20.6     | 15.0     |
| Carbohydrate                       | 65.5     | 66.7     | 25.0     |
| Fat                                | 10.4     | 12.7     | 60.0     |
| Fiber (g %)                        | 4.4      | 4.9      | 4.8      |
| Energy density (kcal/g)            | 3.30     | 3.44     | 5.23     |

**Supplementary Table S2.** Composition of custom Bio-Serv F07679 diet

| Ingredient                  | g/kg   |
|-----------------------------|--------|
| Casein                      | 210.0  |
| L-Cysteine                  | 3      |
| Corn Starch                 | 0.0    |
| Dextrose                    | 222    |
| Sucrose                     | 100.0  |
| Hydrogenated Cottonseed Oil | 325.0  |
| Soybean Oil                 | 25.0   |
| Cellulose                   | 50     |
| Mineral Mix (AIN-93G)       | 35.00  |
| Mineral Mix (AIN-93)        | 10     |
| Choline Bitartrate          | 2.5    |
| tBHQ                        | 0.0014 |

|                |      |
|----------------|------|
| Tableting Aids | 17.5 |
| Total          | 1000 |
